# Supplementary material
Source: PubMed Central journal article supplement (PMC2593663)
Supplement: pp.108.126813_1.pdf [file pp.108.126813_1.pdf]

**Supplemental Table 1: The primers used in this paper.**

| Gene name                                                                    | Primer sequences (5'-3')                         |
|------------------------------------------------------------------------------|--------------------------------------------------|
| The primers used to confirm the genes derived from the analysis of cDNA-AFLP |                                                  |
| <i>actin</i> (X63603)                                                        | CCACACAGGTGTGATGGTTG<br>CACGTCGCACTTCATGATCG-    |
| <i>NtSAM1</i> (AF127243)                                                     | CAGACCAATAAACAAGCTTCA'<br>CCTGAAGGACTCTTTCA      |
| <i>TOBLT</i> (D13952)                                                        | ACCGGAAGACTGCATGCA<br>AACCATCCACCAAAGTTTCA       |
| <i>NtERD10C</i> (AB049337)                                                   | GGAAGAAGAGAAGGCGGGTGA<br>GGTCTTTGAGTGATATCCTGGTA |
| <i>NtSPS</i> (AF194022)                                                      | GAATTCAGGCGCTTCGTTGTCA<br>ACCCCTAGTTTCTCCAGTGA   |
| <i>NtSOD</i> (AB093097)                                                      | GACGGACCTTAGCAACAGG<br>CTGTAAGTAGTATGCATGTTC     |
| <i>NtCA</i> (AF454759)                                                       | CGCCTGTGGAGGTATCAAA<br>GAGAAGGAGAAAGACCGAACT     |
| <i>NtRbohD</i> (AJ309006)                                                    | ACCAGCACTGACCAAAGAA<br>TAGCATCACAACCACAATA       |
| <i>NtCATI</i> (U93244)                                                       | TGGATCTCATACTGGTCTCA<br>TTCCATTGTTTCAGTCATTCA    |
| <i>NtGPX</i> ( AB041518)                                                     | GGTTTGCACCTCGCTTCAAG<br>AGTAGTGGCAAACAGGAAG      |
| <i>NtAPXI</i> (AU15933)                                                      | GAGAAATATGCTGCGGATGA<br>CGTCTAATAACAGCTGCCAA     |
| <i>NtAPX2</i> ( D85912)                                                      | GACAACTCATACTTTACGGA<br>CTTCAGCAAATCCCAACTCA     |
| <i>NtRub-SS</i> (X02353)                                                     | ATGGCTTCCTCAGTTCTTTC<br>CATTGCACTCTTCCGCCGTT'    |
| ChlGapA (M14417)                                                             | CATTGTTGCAAACCAGTGGA<br>TGAGACTTCACAAGGTGGAA     |
| CyGAP (M14419)                                                               | TAAGGATTTGATGCTGGTGA<br>ACATTCCTCAAAGATAACACA    |
| NtRCA342 (U35111)                                                            | AGAGGAAAAGAAGCACAACA<br>AAAGCTCAACCAAATCTTGTA    |
| The walking primers for isolating the promoter of <i>NtSOD</i>               |                                                  |
| <i>NtSOD</i> -1                                                              | GCGGAACCCTAGCCCTGTT                              |
| <i>NtSOD</i> -2:                                                             | GGAGCGAAAAGGTCTGGAAG                             |
| <i>NtSOD</i> -3                                                              | CAGTGCTCCATAGTCGTAGG                             |
| <i>NtSOD</i> -4:                                                             | TGCATTATGTCACCGCTAATTG                           |
| The walking primers for isolating the promoter of <i>NtCA</i>                |                                                  |

|                                                                                                           |                                              |
|-----------------------------------------------------------------------------------------------------------|----------------------------------------------|
| <i>NtCA</i> -1                                                                                            | AGGGGAGATA GTAAGGCAAC                        |
| <i>NtCA</i> -2                                                                                            | GCAACAGGACGAGTTGGTTT                         |
| <i>NtCA</i> -3:                                                                                           | GGGAACAGAAGGAGAAGAAG                         |
| <i>NtCA</i> -4                                                                                            | CATTTGGCTC AAGAACTTCCT                       |
| Primers used to generate different length promoters of <i>NtCA</i>                                        |                                              |
| CA-P1-5'                                                                                                  | CGGCTGCAGAAGGTTAATTGATTTAGTTGAAG             |
| CA-P2-5'                                                                                                  | CGGCTGCAGAGATAAGAGGAGCCAAAAGTG               |
| CA-P3-5'                                                                                                  | CGGCTGCAGTTCAACATGTTAACAAAAGCAAT             |
| CA-P4-5'                                                                                                  | CGGCTGCAGAAAATATTTTTACTATTTCAGGC             |
| CA-P5-5'                                                                                                  | CGGCTGCAGAACGGAATTCAATTAACCTCTC              |
| CA-P6-5'                                                                                                  | CGGCTGCAGCATCTGTGATCAGCAATAATTG              |
| CA-P7-5'                                                                                                  | CGGCTGCAGAAGTAAATTAGTTCTGATCACTC             |
| CA-mini-5'                                                                                                | CGGCTGCAGCAACGTACAAACCTCATCTAC               |
| CA-3'                                                                                                     | CGGAGATCTACCATGGTTGGCTCAAGAACTTCCTTTT        |
| Primers used to generate different length promoters of <i>NtSOD</i>                                       |                                              |
| SOD-f-5'                                                                                                  | CGGCTGCAGTTTGGTGTGTTTCATTTTGG                |
| SOD-p1-5'                                                                                                 | CGGCTGCAGGTGGGAAGAGCATTAGG                   |
| SOD-p2-5'                                                                                                 | CGGCTGCAGATCCGTTACAAATGCGA                   |
| SOD-mini-5'                                                                                               | CGGCTGCAGTTTCCCTTCATTTTTCATTC                |
| SOD-3'                                                                                                    | CGGAGATCTACCATGGTTTTTCAGATATCCCAAATGC        |
| Primers used to generate the removal of GCC box or 39 bp fragment from <i>NtSOD</i> -f or <i>NtCA</i> -p1 |                                              |
| GCC box del-5'                                                                                            | GTGGGAAGAGCATTAGG                            |
| GCC box del-3'                                                                                            | TCGCATTTGTAACGGAT                            |
| 39 bp-del-5'                                                                                              | CATCTGTGATCAGCAATAATTG                       |
| 39bp-del-3'                                                                                               | GAGTGATCAGAACTAATTTACTT                      |
| Primers used to detect the expression of <i>JERF3</i> in transgenic tobacco and in tomato                 |                                              |
| <i>JERF3</i><br>(AY383630)                                                                                | GAGGATGACCATTATGATTC<br>GGTACCATAGTAACGGGGGT |
| The walking primers for isolating the promoter of tomato <i>JERF3</i>                                     |                                              |
| <i>JERF3</i> -1                                                                                           | CCGTCAAAACTAAATCATGA                         |
| <i>JERF3</i> -2                                                                                           | GGTGGTTCTATAATCTCCG                          |
| <i>JERF3</i> -3                                                                                           | TCACCGCCGAGTTTCTATGG                         |
| <i>JERF3</i> -4                                                                                           | ATGGGGTCGTTTCGATCTCG                         |

### **Supplemental Legends:**

#### **Supplemental Figure 1: Expression of *JERF3* in tobacco has no effect on the growth at normal growth conditions.**

(A) Different expression of *JERF3* in 5 independent OE lines and WT in 4 week old tobacco seedlings. (B) Phenotypes of 10 week old seedling development. (C) Phenotypes of flowering stage.

#### **Supplemental Figure 2: Expression of *NtSPS* in response to cold.**

4 week old tobacco seedlings in pots under 4°C were used to extract RNA. The expression of *NtSPS* in tobacco was detected by Q-PCR. The actin transcripts were used as internal control, and the expression level of *NtSPS* was standardized as 100 at time “0”. The assay was repeated three times. The bars represent ( $\pm$ ) SE.

#### **Supplemental Figure 3: LeEIL1 interacts with the promoter of *JERF3* in transient expression assays.**

LeEIL1 interacts with the promoter of *JERF3* *in vivo*. Sequence of the *JERF3* promoter was cloned to replace the promoter of 35S in pBI121, upstream of the GUS reporter gene. LeEIL1 indicates the constitutive expression of full length *LeEIL1*; None, as the negative control of the effector, indicates the empty vector plasmid. Agrobacteria containing the reporter vector and effector vector were co-infiltrated into tobacco leaves. The relative GUS activity is the ratio of GUS reporter expression (35S:LeEIL1/empty vector). The assay was repeated three times. Error bars indicate  $\pm$ SE.

### **Supplemental procedures**

#### **Plant materials and Growth conditions**

All plants were grown in growth chambers at 25°C with a 16-hr light regime with illumination from cool white fluorescent lights of about  $150 \mu\text{mol m}^{-2} \text{s}^{-1}$ . For the observation of tobacco growth, all plants of 5 independent OE lines and WT were put in pots. For root phenotypes, 10 week old seedlings in pots were gently washed with water,

and then photographed. For the cold treatment, 4 week old wild type tobacco (*Nicotiana tabacum* cv NC89) plants were treated at a temperature of 4°C for the time indicated in supplemental Figure 2.

### **RT-PCR and Real time Q-PCR assays**

Total RNA was extracted using Trizol (Invitrogen, USA) according to the manufacturer's recommendations. 1 µg of total RNA was used to synthesize cDNA using 200 units of M-MLV reverse transcriptase (Promega, USA) following the manufacturer's instructions. After reverse transcription, RT-PCR or real time quantitative polymerase chain reactions (Q-PCR) were performed, the latter using an ABI Prism 7000 system (Applied Biosystems, USA). The mRNA levels detected with ethidium bromide staining were recorded by Molecular Imager® FX (Bio-Rad). The relative transcript abundance for each gene is relative to the *actins* transcript levels measured in the same sample. The primers used in this paper for RT-PCR or Q-PCR are listed in Supplemental Table 1.
